Research Article

# Exploration of the effects of goose TCs on GCs at different follicular stages using a co-culture model

Xiang Gan, Yushi Wang, Shanyan Gao, Xi Chen, Shenqiang Hu,  Jiwen Wang, Jiwei Hu, Liang Li and Chunchun Han

Farm Animal Genetic Resources Exploration and Innovation Key Laboratory of Sichuan Province, Sichuan Agricultural University, Chengdu, Sichuan, China

**Correspondence:** Jiwen Wang (wjw2886166@163.com)

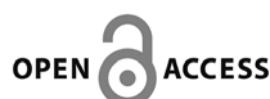

Granulosa cells (GCs) play a critical role in follicular development, which cannot be separated from the assistance of theca cells (TCs). In the present study, we used a transwell system to develop three stages of goose GCs *in vitro* mono-culture and co-culture models, and we analyzed the morphology, activity, intracellular lipid content and the expression of core genes involved in *de novo* lipogenesis (DNL), steroidogenesis, proliferation and apoptosis of the GCs. In the co-culture group, the activity of all three stages of GCs showed significant ( $P < 0.01$ ) changes, and they had a strong ( $P < 0.01$ ) correlation with culture time; further, the intracellular lipid deposition of hierarchical GCs was significantly different ( $P < 0.01$ ) between the two methods. Moreover, after co-culture, in pre-hierarchical GCs, the expression of *SREBP*, *CYP11* and *3 $\beta$ HSD* was promoted ( $P < 0.01$ ). In hierarchical GCs, the expression of *ACC*, *SREBP*, *STAR*, *CYP11*, *3 $\beta$ HSD* and *CCND1* was promoted at 48 h, but they were inhibited ( $P < 0.05$ ) at 96 h. In F1 GCs, the expression of *ACC*, *FAS*, *SREBP*, *CYP11*, *BCL2* and *CAS3* was inhibited ( $P < 0.01$ ). The results indicate that goose TCs had complex and time-dependent effects on the biological function of GCs at each corresponding stage, and the effects were distinct in the different stages. In addition, DNL, steroidogenesis, proliferation and apoptosis in hierarchical and F1 GCs might have some synergistic relationships in the effects of TCs on GCs. Furthermore, we speculated that TCs might play an important role in the differentiation and maturation of GCs during follicular development.

## Introduction

The granulosa cell (GC) is a part of the follicle, and it is important for follicular growth and development [1–3]. The theca cell (TC) is also a component of follicles; TCs are separated from GCs by a basement membrane, and assist GCs in regulating follicles by endocrine processes [4–7].

In mammals, GCs and TCs together constitute the steroid synthesis system of follicles, and these roles in synthesis are their main physiological functions [7,8]. Follicle synthesis includes the production of various steroids, mainly progesterone, androgen and estrogen. Progesterone is mainly synthesized in GCs, while androgens can be synthesized in TCs by using the progesterone synthesized in GC, and androgens can then be used as substrates to further synthesize estrogens in GCs [9,10]. It is clear that steroid synthesis in follicles requires the cooperation of GCs and TCs. Not only that, TCs can also secrete growth factors [11–17] to act on GC; however, in mammals, TCs have an important effect on the biological function of GCs in follicle regulation.

In contrast with mammals, the effects of TCs on GCs have specific avian characteristics [18,19]. For example, in steroidogenesis, estrogen in poultry follicles is synthesized by theca externa cells, not GCs. Moreover, the mechanism of steroid synthesis in poultry is also distinct in the different stages of follicles. In pre-hierarchical follicles, all steroids are synthesized by TC, while in hierarchical follicles, progesterone, androgen and estrogen are synthesized by GCs, theca interna and theca externa cell; that is, the pattern of steroid synthesis varies with follicle development [18,20–22].

Received: 28 February 2020

Revised: 29 June 2020

Accepted: 21 July 2020

Accepted Manuscript online:  
24 July 2020

Version of Record published:  
07 August 2020

Obviously, the effect of TCs on GCs is important for follicular development in poultry. However, there are few reports on the specific mechanisms of TCs effects on GCs at different developmental stages of follicle. Therefore, we developed a noncontact transwell co-culture system of GCs (with TCs at same stage) from goose (an important and relatively low-yielding poultry species) pre-hierarchical, hierarchical (F4–F2) and F1 follicle stages [23]; fetal bovine serum (FBS) medium was used in the models for long-term culture [24,25]. The aim was to explore the dynamic influences of TCs on GCs at different follicular development stages *in vivo*. We hope this present work will lay a theoretical foundation for the study of mechanisms of follicular development in poultry.

## Materials and methods

### Experimental animals

The healthy laying maternal line of Tianfu meat geese (*Anser cygnoides*, 35–45 weeks of age) was used in the present study. All geese were grown under natural conditions of light and temperature at the Experimental Farm for Waterfowl Breeding at Sichuan Agricultural University (Sichuan, China), and the geese were provided with unlimited access to feed and water. Individual laying cycles were recorded for each goose, and all geese in the same laying cycle were killed by cervical dislocation 7–9 h before oviposition. All the experiments were carried out in Sichuan Agricultural University (Sichuan, China), and all procedures in the present study were approved by the Laboratory Animal Operation Standard and Welfare Management Committee, Sichuan Agricultural University (Sichuan, China, permit No. DKY-B20141401).

### Separation of goose follicle GCs and TCs at three stages

Pre-hierarchical, hierarchical (F4–F2) and F1 follicles [23] from each ovary were dissected and washed with ice-cold sterile phosphate buffered saline (PBS, pH 7.4, Solarbio). Tweezers were used to peel away the connective tissue, and then an approximate 0.5–2.0 cm slit was cut with a surgical blade across from the stalk. The yolk and the granulosa layer flowed out. In addition, granulosa and theca tissues were washed several times with PBS to wash away the yolk separately, and the further separation and culture method for the GCs and TCs was performed as described in our previous studies [23,26].

### Mono-culture and co-culture of goose GCs

The three stages GCs were seeded in six-well plates (Corning) at  $1.2 \times 10^6$  per well with 2.5 ml of Dulbecco's modified Eagle medium (DMEM) F-12 (HyClone) containing 10% FBS (Gibco). The corresponding stages of TCs were seeded in transwell insert wells (Corning, 6-well plates, bore diameter 0.4  $\mu$ m) at  $1 \times 10^6$  per well in 1.5 ml of DMEM/F12 medium containing 10% FBS. Both cell types were cultured at 37°C under an atmosphere of 5% CO<sub>2</sub> in humidified air. After the cells adhered (6–8 h), the culture medium was changed. In the co-culture group, two types of cells from the same follicular stage were placed in the same culture plate, and then the co-culture began (set as 0 h). For the GCs in the mono-culture group, we used a transwell insert well with no cells but containing 1.5 ml of culture medium as the control (Figure 1).

### Oil Red O stain, extraction and 3-(4, 5-Dimethylthiazol-2-yl)-2, 5-Diphenyltetrazolium Bromide Assay (MTT) assays

The activity of mono-cultured and co-cultured GCs was measured every day for 7 days by MTT (Amresco) assays, which were performed as described previously [23,26]. At 48 and 96 h, Oil red O (Solarbio) staining and extraction were performed in both mono-culture and co-culture GC groups, and the experimental method was performed according to previous literature reports [27]; to highlight the cell morphology and the effect of the Oil red O stain, we used hematoxylin (Solarbio) for restaining. Random images were captured using a microscope (Olympus) to assess cell morphology, and the OD value of Oil red O extraction in each well was monitored by an automatic enzyme immunoassay analyzer (Thermo) at 510 nm.

### Isolation of total RNA and quantitative real-time PCR

TRIzol (Invitrogen) was used to isolate total RNA from the three stages of cultured GCs at 0 h and in two methods at 48 and 96 h. The RNA was reverse-transcribed using a PrimeScript™ RT system kit for real-time PCR (TaKaRa, Japan) according to the manufacturer's instructions. qPCRs were performed in a CFX96™ Real-Time system (Bio-Rad, CA, U.S.A.) using a SYBR PrimeScript™ real-time PCR kit (TaKaRa). qPCRs were performed in a 25  $\mu$ l reaction volume that included 2.0  $\mu$ l of cDNA, 12.5  $\mu$ l of SYBR Premix EX Taq, 8.5  $\mu$ l of sterile water, and 1.0  $\mu$ l of each gene-specific

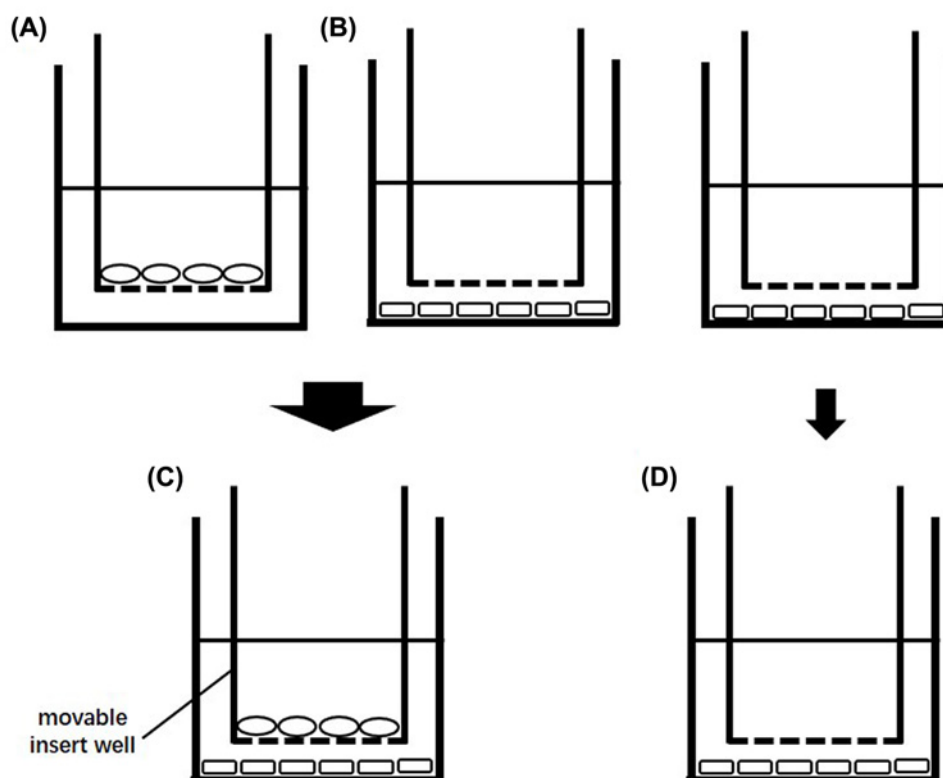

**Figure 1. Transwell culture system and GCs and TCs culture process**

(A) TCs seeding diagram; (B) GCs seeding diagram; (C) diagram of co-culture group; (D) diagram of mono-culture group; The ellipses represent TCs and the rectangles represent GCs.

primer. The raw results were repeated three times and normalized to glyceraldehyde-3-phosphate dehydrogenase (GAPDH) using the  $2^{-\Delta\Delta C_t}$  method [28]. Primers for the tested genes are listed in Table 1.

## Statistical analysis

Analyses of the differential mRNA expression data of GCs at different time points (0, 48 and 96 h) in the same cultural method and same stages were subjected to one-way ANOVA, and the means were assessed for significant differences using Tukey's tests. Analyses of the cell activity, lipid content and mRNA expression data from the GCs in different cultural methods at different times (48 and 96 h) at the same stage were subjected to two-way ANOVA, and the means were assessed for significant differences using the Bonferroni test. The results are expressed as the mean  $\pm$  SEM., and a *P*-value below 0.05 was considered statistically significant. The statistical analyses were carried out using GraphPad prism 7 [29–32].

## Results

### Morphological characteristics, growth curves and cell activity of GC at three stages in two cultural methods

The results showed that for pre-hierarchical GC, there was no obvious difference in cell morphology or the number of GCs in different culture methods at either 48 and 96 h (Figure 2A), which was consistent with the growth curve (Figure 2B); the divergences in growth curves occurred after 96 h. For hierarchical GCs, there was no obvious difference in the number of GCs between the two methods at 48 and 96 h (Figure 2A), which was basically consistent with the growth curve of MTT (Figure 2B). Moreover, the growth peaks between the two methods were also different; in mono-culture, the GC activity reached its growth peak at 96 h, while that of the co-culture peaked at 120 h. At the F1 stage, there was no obvious difference in cellular activity in different culture methods until 120 h. Two-way ANOVA

**Table 1** Primer pairs for real-time quantitative PCR

| Gene                           | Sequence (5' to 3')                                       | $T_m$ (°C) | Size (bp) |
|--------------------------------|-----------------------------------------------------------|------------|-----------|
| <i>PPAR<math>\gamma</math></i> | F: CCTCCTTCCCCACCCATT<br>R: CTTGTCCCCACACACACGA           | 59         | 108       |
| <i>ACC</i>                     | F: TGCCTCCGAGAACCCTAA<br>R: AAGACCACTGCCACTCCA            | 57         | 163       |
| <i>FAS</i>                     | F: TGGGAGTAACACTGATGGC<br>R: TCCAGGCTTGATACCACA           | 57         | 109       |
| <i>SREBP</i>                   | F: CGAGTACATCCGCTTCTCTGC<br>R: TGAGGGACTTGCTCTTCTGC       | 60         | 92        |
| <i>STAR</i>                    | F: AGAATCTTGACCTCTTTGACGCTG<br>R: GAGACGGTGGTGATAACGGA    | 60         | 87        |
| <i>CYP11</i>                   | F: AGGGAGAAGTTGGGTGTCTACGA<br>R: CGTAGGGCTTGTGCGGTAGT     | 60         | 89        |
| <i>3<math>\beta</math>-HSD</i> | F: GACCTGGGGTTTGGAATTGAG<br>R: TAGGAGAAGGTGAATGGGGTGT     | 60         | 170       |
| <i>CCND1</i>                   | F: AGGAGCAGAAGTGCGAAGA<br>R: TGCGGTCAGAGGAATAGTTT         | 60         | 158       |
| <i>BCL2</i>                    | F: CCTTCGTGGAGTTGTATGGCA<br>R: CCACCAGAACCCTCAAGGATA      | 60         | 100       |
| <i>CAS3</i>                    | F: CTGGTATTGAGGCAGACAGTGG<br>R: CAGCACCTACACAGAGACTGAA    | 62         | 158       |
| <i>*GAPDH</i>                  | F: GCTGATGCTCCCATGTTCTGTGAT<br>R: GTGGTGCAAGAGGCATTGCTGAC | 59.6       | 86        |

F, sense primers; R, antisense primers

<sup>a</sup>\*Housekeeping gene for data normalization

(Figure 2C) showed that the growth activity of GCs at three stages was significantly affected by the cultural method ( $P < 0.01$ ), and the effect was closely related to the culture time ( $P < 0.01$ ).

## Oil Red O Extraction of GC

Oil red extraction could indicate the intracellular lipid deposition of GCs. The results showed that in pre-hierarchical and hierarchical stages, GC lipid deposition had an extremely significant ( $P < 0.01$ ) correlation with time in culture (Figure 3A,B,D), while at 96 h, the lipid deposition in GCs in hierarchical co-culture was significantly ( $P < 0.01$ ) higher than it was in mono-culture. In F1 GCs, neither culture time or method had a significant effect on lipid deposition.

## mRNA expression profiles of key *de novo* lipogenesis (DNL) genes during GC culture

We detected the expression of key *de novo* lipogenesis (DNL) genes in GCs (Figure 4). In pre-hierarchical GCs, only *FAS* was inhibited in the 96 h co-culture method. In hierarchical GCs, co-culture promoted the expression of DNL genes at 48 h and inhibited them at 96 h. At 48 h, the expression of proliferator-activated receptors  $\gamma$  (*PPAR $\gamma$* ) and acetyl CoA carboxylase (*ACC*) genes in the co-culture method significantly ( $P < 0.01$ ) increased (fatty acid synthase (*FAS*) gene expression increased but not significantly), while at 96 h, *ACC* and *FAS* were significantly ( $P < 0.01$ ) decreased (*PPAR $\gamma$*  expression decreased but not significantly). For F1 GCs, *ACC* and *FAS* were significantly ( $P < 0.01$ ) decreased at 96 h in co-culture.

## mRNA expression profiles of key steroidogenesis pathway genes during GC culture

As shown in Figure 5, it was found that co-culture promoted the steroidogenesis pathway in pre-hierarchical GCs; sterol regulatory element-binding protein 1 (*SREBP*) and cholesterol side chain cleavage (*CYP11*) genes significantly increased ( $P < 0.01$ ) at 48 h, and 3 $\beta$ -hydroxysteroid dehydrogenase (*3 $\beta$ HSD*) significantly increased ( $P < 0.01$ ) at 96 h. In hierarchical GCs, co-culture had a tendency to promote and then inhibit steroidogenesis. At 48 h, co-culture significantly ( $P < 0.01$ ) promoted the expression of *SREBP*, steroidogenic acute regulatory protein (*STAR*), *CYP11*



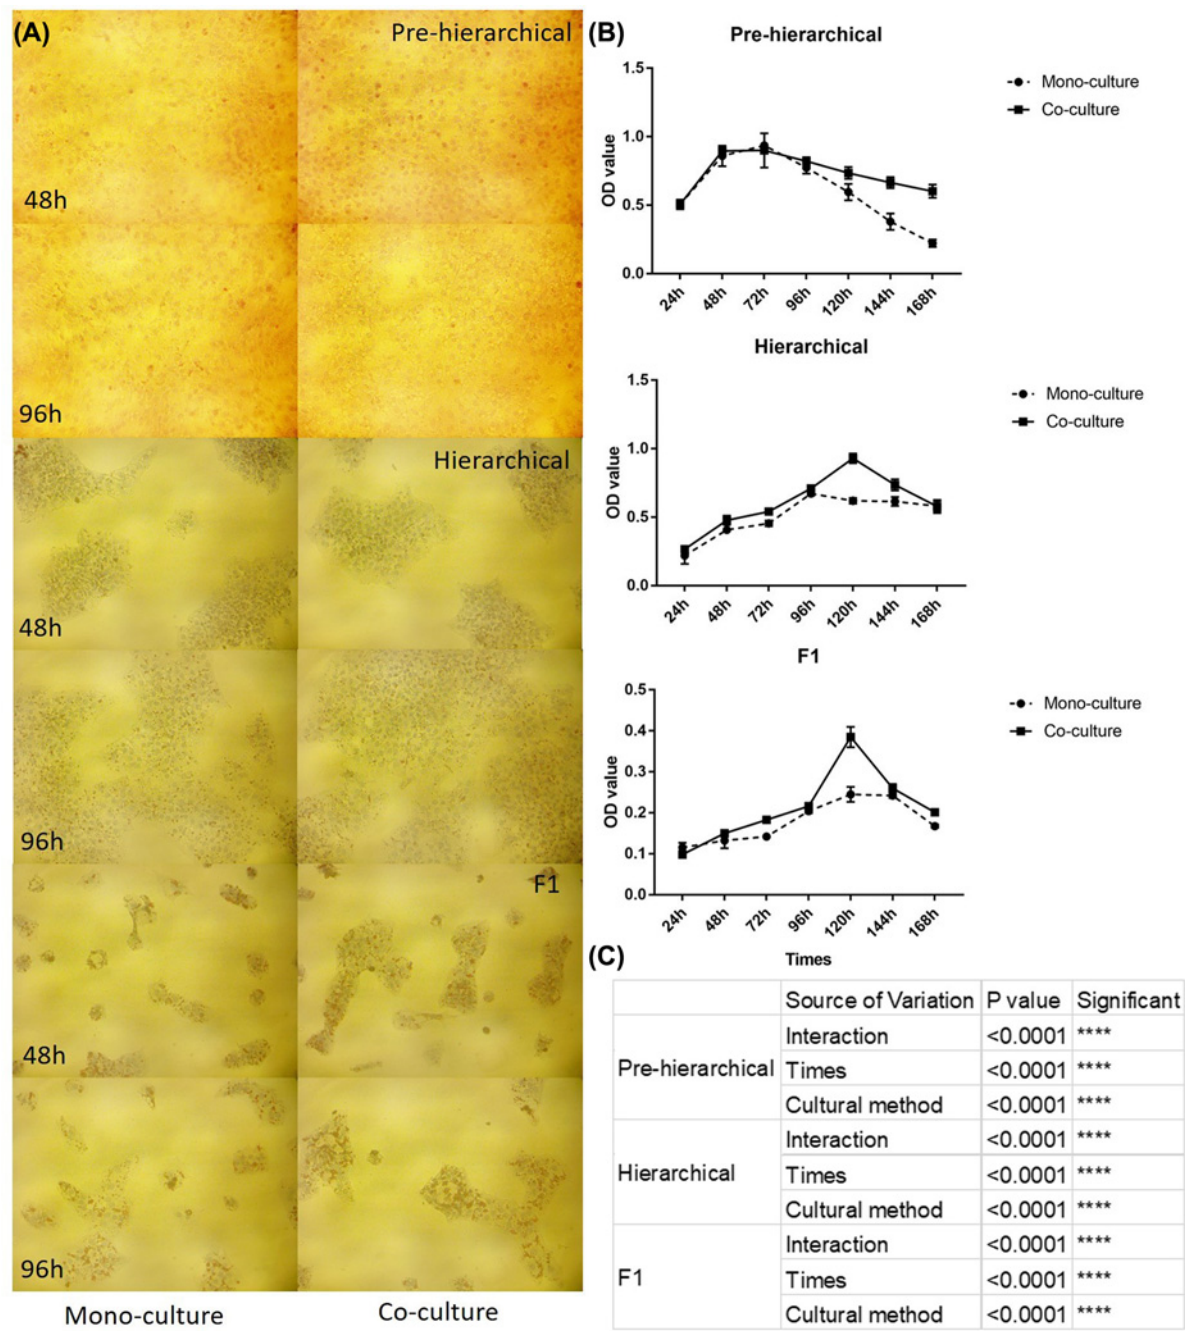

**Figure 2. Oil red O-labeled morphology and MTT activity growth curve of GCs using the two culture methods**  
(A) Photo Oil red O-labeled morphology of GCs at 48 and 96 h at three stages using a 200-fold microscope. (B) MTT activity growth curve of GCs for 7 days. (C) Two-way ANOVA for the cultural methods, culture time and GC activity.

and  $3\beta$ HSD, but at 96 h, co-culture resulted in an extremely significant ( $P<0.01$ ) inhibition of the above genes (significant ( $P<0.05$ ) inhibition of *STAR*). In F1 GCs, co-culture significantly ( $P<0.01$ ) inhibited both *SREBP* (96 h) and *CYP11* (48 and 96 h).

## mRNA expression profiles of key genes involved in proliferation, apoptosis and anti-apoptosis pathways in GCs

As shown in Figure 6, in pre-hierarchical GCs, the culture method had no significant effect on the genes Cyclin D1

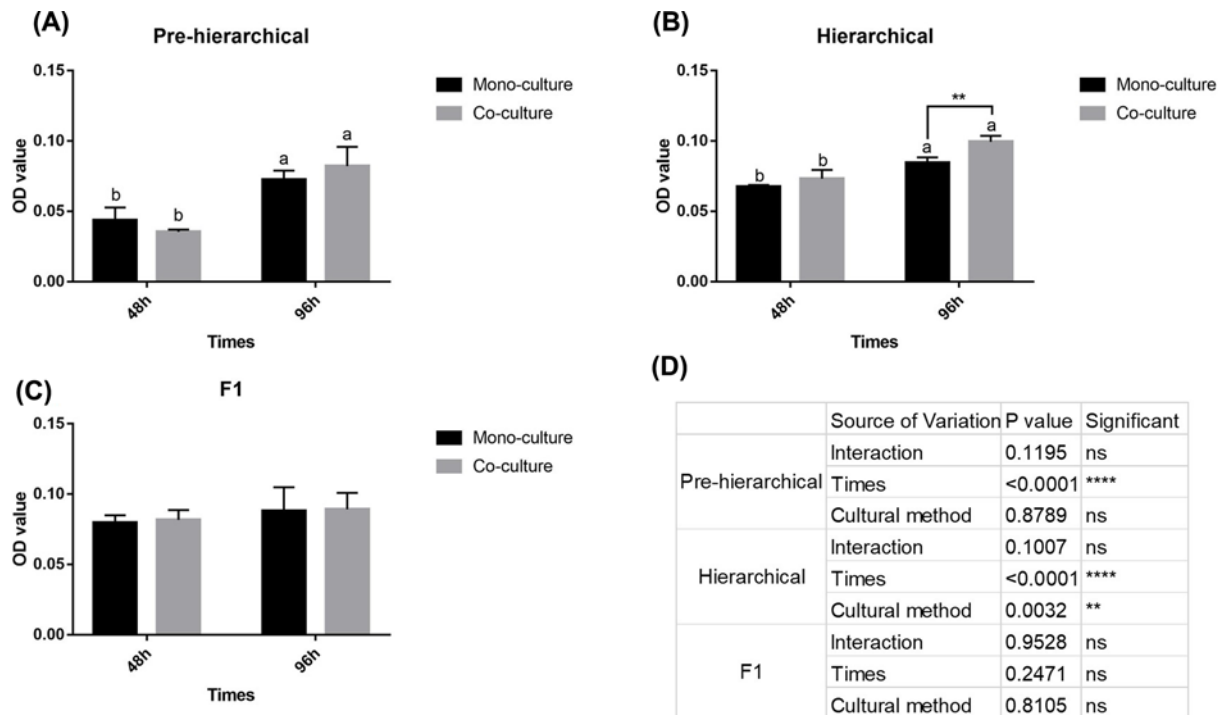

**Figure 3.** Oil red O extraction of GCs using the two culture methods

(A–C) Oil red O extraction was performed for the two GC methods at three stages, (D) and two-way ANOVA was performed. The different lowercase letters (a and b) at the top of each bar represent the significant differences among lipid deposition at different time points using the same culture method and the same stages ( $P < 0.05$ ), and the \* represents the significant differences between culture methods at the same time points and stages (\* $P < 0.05$  and \*\* $P < 0.01$ , respectively).

(*CCND1*), B-cell lymphoma-2 (*BCL2*) and Caspase-3 (*CAS3*). In hierarchical GCs, co-culture significantly ( $P < 0.01$ ) promoted expression of *CCND1* at 48 h and significantly inhibited *CCND1* and *BCL2* ( $P < 0.05$ ) at 96 h. In F1 GCs, co-culture significantly ( $P < 0.01$ ) inhibited *BCL2* (48 and 96 h) and *CAS3* (96 h).

## Discussion

GCs are an indispensable component of the follicular wall, and they can influence follicle recruitment, growth, selection and maturation through providing support and nutrition and through secretion of factors. TCs are adjacent to GCs, and TCs can communicate with GCs and influence their characteristics and regulation of follicles [5,24,33,34]. However, in poultry, the reports on these interactions and regulation are very limited. Therefore, in the present study, we developed a co-culture model using a transwell system to explore the effects of TCs on GCs at different developmental stages of follicle in the goose.

The activity of GCs was measured in 7-day mono-culture and co-culture groups. The results indicated that the TCs at the three stages had a certain effect on the growth activity and the trends of GCs in the corresponding stages (Figure 2A,B) [35]. In addition, as a whole (Figure 2C), TCs at all stages had a significant effect on the activity of GCs, and the effect was also significantly related to the amount of time in co-culture.

Subsequently, we detected the intracellular lipid content of GCs at three stages and found that co-culture had no significant effect on lipid deposition in F1 and pre-hierarchical GCs at 48 and 96 h (Figure 3A,B,D), which was consistent with their morphology (Figure 2A). For hierarchical follicles, co-culture time and the presence of TCs had significant effects on lipid deposition in GCs, but combined with Figure 2A, it was speculated that the increase in lipid deposition may have been partly due to the increase of GC number.

The mechanism of DNL in GCs has an important effect on follicles and is closely related to follicle proliferation, apoptosis and steroidogenesis (Figure 4) [27,36]. In hierarchical GCs, the trend of changes in DNL key genes between mono-culture and co-culture were different, suggesting that hierarchical TCs had a certain effect on DNL in GCs. Moreover, in co-culture, TCs promoted the expression of key DNL genes in GCs at 48 h, but at 96 h, their expression was inhibited. These results suggest that the mechanism of TC action on GCs in hierarchical follicles might be complex

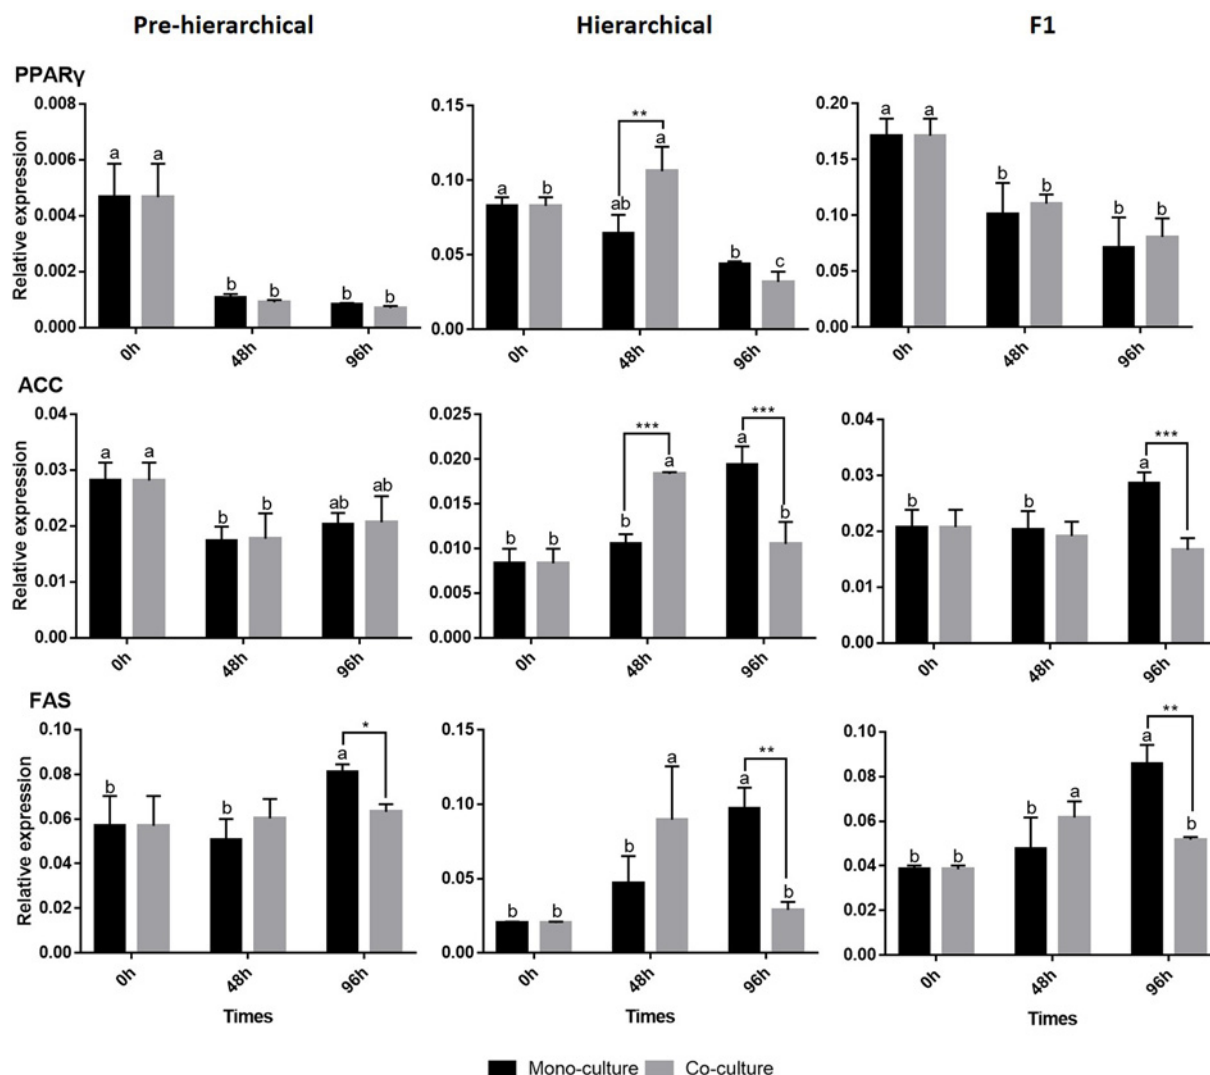

**Figure 4. Relative expression of key DNL genes in GCs using the two culture methods**

The different lowercase letters (a, b, and c) at the top of each bar represent the significant differences between the gene expression at different time points using the same culture method and the same stages, and the \* represents the significant differences between the culture methods at the same time points and stages (\* $P < 0.05$  and \*\* $P < 0.01$ , respectively).

and closely related to the time in culture [37]. Co-culture had a significant inhibition of the DNL genes (ACC and FAS) in F1 GC, but it had no significant effect on DNL in pre-hierarchical GCs, indicating that TCs had different effects on GC DNL at different stages. Combined the results of Figure 3, we found that some changes in the core genes of the DNL pathway did not affect the lipid deposition of GCs, suggesting that DNL in GCs might be related to other physiological mechanisms [27].

Steroidogenesis is one of the most important functions in GCs [38–40]. The results showed that co-culture had a certain effect on the steroidogenesis mechanism of follicular GCs (Figure 5), which is consistent with the physiological pattern of TCs and GCs in poultry [41]. In pre-hierarchical follicles, co-culture had a significant effect on the core genes of steroidogenesis (*SREBP*, *CYP11*, and *3 $\beta$ HSD*) in GCs, suggesting that the effect of the TC steroid pathway on GCs existed before selection. At 96 h, *3 $\beta$ HSD* (a key gene in progesterone synthesis) expression in GCs in co-culture was significantly higher than it was in mono-culture. Combining these data with what is found in the literature [19,42], the pre-hierarchical follicle GCs in poultry did not have the ability to synthesize progesterone, suggesting that in pre-hierarchical follicles, TCs might induce GC development, differentiation and activation of its progesterone synthesis pathway; this conclusion is partly consistent with the GC *in vivo* developmental process [21,43].

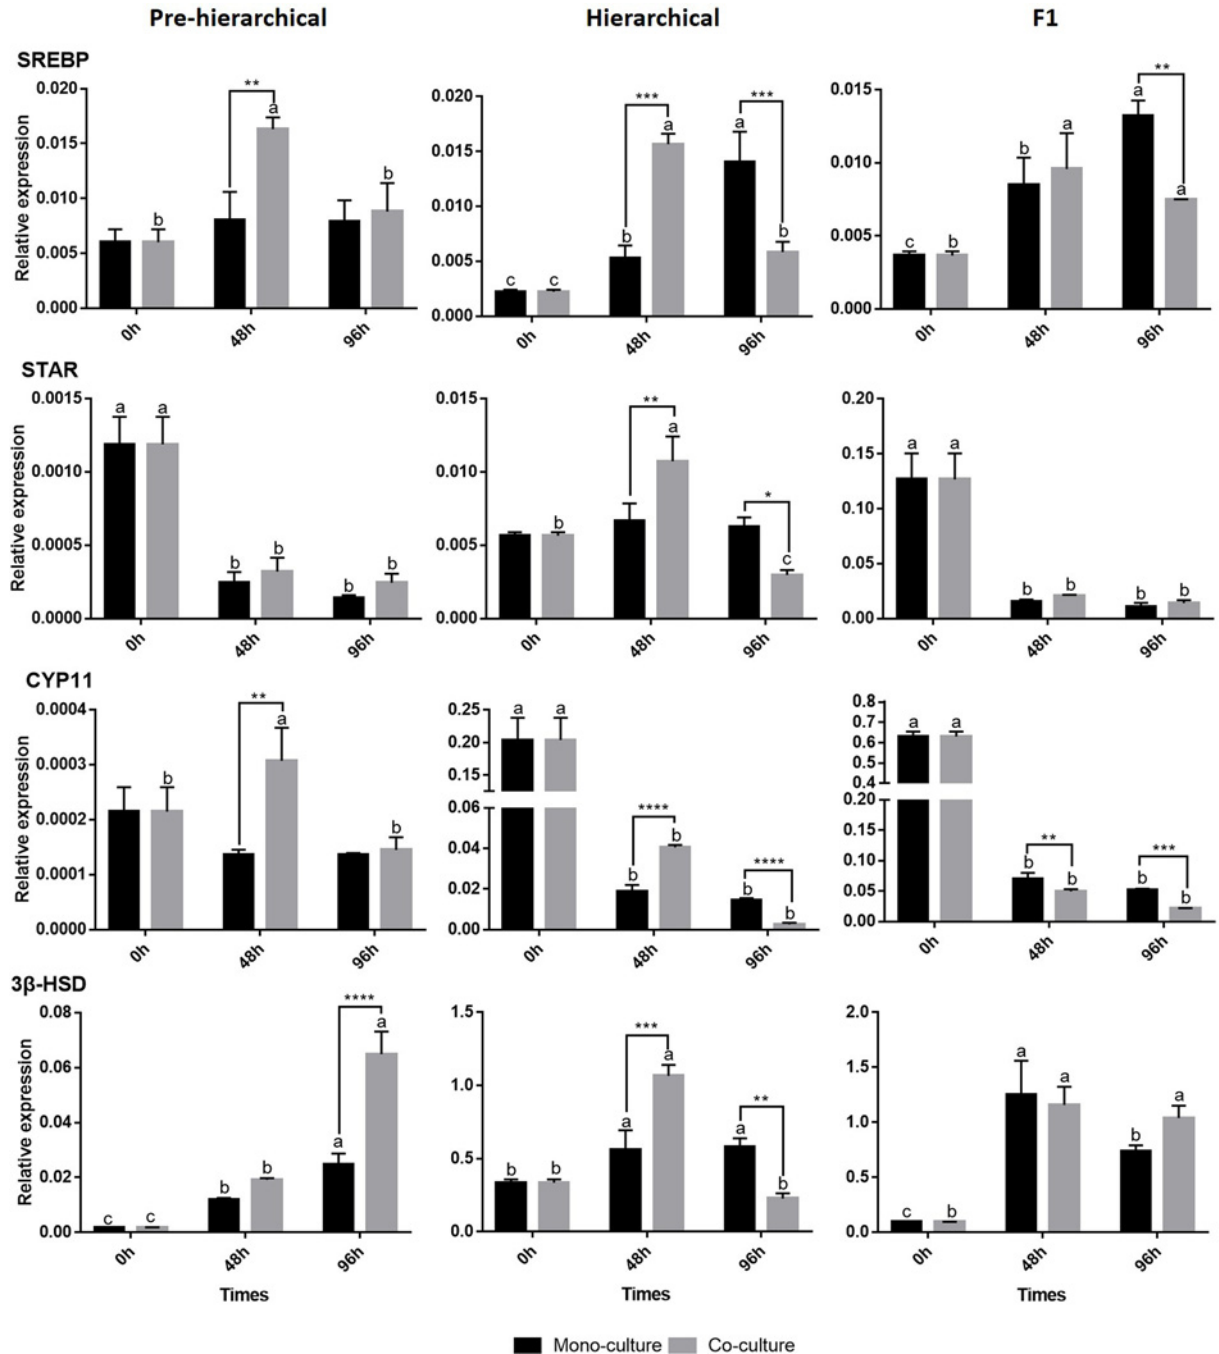

**Figure 5. Relative expression of key steroidogenesis genes in GCs using the two culture methods**

The different lowercase letters (a, b, and c) at the top of each bar represent the significant differences between the gene expression at different time points using the same culture method and the same stages, and the \* represents the significant differences between the culture methods at the same time points and stages (\* $P < 0.05$  and \*\* $P < 0.01$ , respectively).

These results emphasize the effect of TCs on GC differentiation and follicular selection. Similar to DNL in hierarchical GCs, TCs promoted the expression of key genes in the hierarchical GC steroidogenesis pathway at 48 h but inhibited them at 96 h, which confirmed that the effect of TCs on GCs was related to the time in co-culture [44]. In F1 follicles, although it has been reported that F1 GCs have a strong ability to synthesize progesterone [20–22], this activity might not be related to TC. TCs had no significant effect on the expression of  $3\beta$ HSD (Figure 5), but they could significantly inhibit the expression of *SREBP* and *CYP11*. These results indicate that co-culture had different



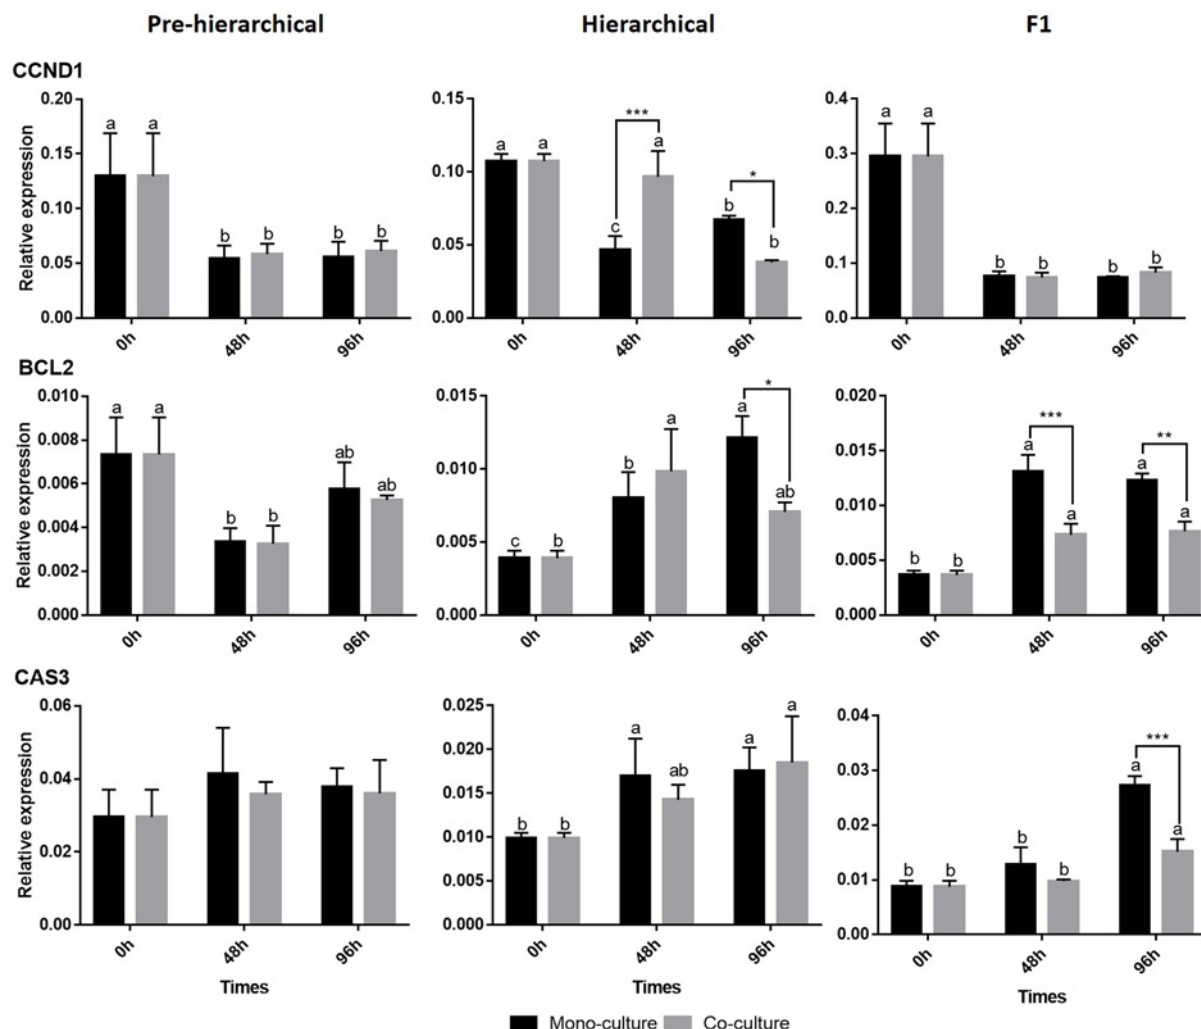

**Figure 6.** Relative expression of proliferation, apoptosis and key anti-apoptotic pathway genes in GCs using the two culture methods

The different lowercase letters (a, b, and c) at the top of each bar represent the significant differences between the gene expression at different time points using the same culture method and the same stages, and the \* represents the significant differences between the culture methods at the same time points and stages (\* $P < 0.05$  and \*\* $P < 0.01$ , respectively).

effects on steroidogenic mechanisms at three GC stages. Such different effects of TCs on GCs at different stages were also shown in mammals [8,24,45,46], but the trends were different from those in poultry. These results suggest that TCs might play a unique role in the regulation of GC in poultry.

Proliferative and apoptotic pathways in GCs had a direct effect on follicular development (Figure 6), so we also analyzed the core genes of these processes [41,47,48]. The qPCR results of genes involved in proliferation and apoptosis in pre-hierarchical GCs cultured in the two methods were basically consistent with their growth curve (before 96 h), indicating that TCs had no significant effect on the proliferative and apoptotic pathways in pre-hierarchical GCs before 96 h. After co-culture, proliferation and apoptosis in hierarchical and F1 GCs showed significant changes, and the changes were different, suggesting that TCs had different effects on proliferation and apoptosis in GCs at different stages.

In addition, we analyzed expression patterns for GC functional pathways. In F1 GCs, the genes *BCL2*, *CAS3*, *ACC*, *FAS*, *SREBP* and *CYP11* showed similar expression trends (Figures 4-6), and they were all significantly inhibited in co-culture at 96 h (*BCL2* and *CYP11* were inhibited at both 48 and 96 h), suggesting that there might be some synergy and interaction between the anti-apoptotic, apoptotic, DNL and steroidogenesis pathways in F1 GCs. Moreover, after

co-culture, the hierarchical GC gene expression of *CCND1* (Figure 6), *ACC* (Figure 4), and genes in the steroidogenesis pathway (Figure 5) also showed the same trend (increased significantly at 48 h and decreased significantly at 96 h), while the gene expression of *BCL2*, *PPAR $\gamma$*  and *FAS* also showed a similar trend (but not significant at either time point) of promotion followed by inhibition. This confirmed that TCs had a complex and time-dependent effect on hierarchical GCs [18,49] and further supported that in hierarchical and F1 follicles, there might be some synergies and interactions between proliferation, anti-apoptosis, DNL and steroidogenesis pathways when TCs are affecting GCs [27,36,50,51]. However, interestingly, the effects of TCs on the functional pathways of F1 GCs and hierarchical GCs at 96 h were similar (Figures 4–6). We speculated that the TCs of hierarchical follicles might also have the ability to induce GCs to further develop and differentiate into preovulation follicles (F1) GCs.

In summary, the present study shows for the first time that three stages of goose follicle TCs have certain effects on the cell activity, lipid metabolism, steroidogenesis, proliferation and apoptosis of GCs *in vitro*. The effects are complex, time-dependent and unique per different follicle stage. In addition, DNL, steroidogenesis, proliferation and apoptotic pathways in hierarchical and F1 GCs may have some synergistic relationship in the process of TCs regulating GCs. Furthermore, we speculate that TCs may play an important role in the differentiation and maturation of GCs during follicular development.

## Competing Interests

The authors declare that there are no competing interests associated with the manuscript.

## Funding

This work was supported by the National Natural Science Funds of China [grant number 31672424]; and the China Agricultural Research System [grant number CARS-42-4].

## Author Contribution

Xiang Gan, ShanYan Gao and Xi Chen performed the majority of the experiments. YuShi Wang, ShenQiang Hu, JiWen Wang, Jiwei Hu, Chunchun Han and Liang Li performed some of the experiments and provided reagents, animal materials and critical comments on the paper. Xiang Gan, YuShi Wang and Jiwen Wang devised the hypothesis and experimental plan, and wrote the paper.

## Abbreviations

3 $\beta$ HSD, 3 $\beta$ -hydroxysteroid dehydrogenase; DNL, *de novo* lipogenesis; FBS, fetal bovine serum; GC, granulosa cell; *SREBP*, sterol regulatory element-binding protein 1; TC, theca cell.

## References

- Johnson, A.L. (2014) The avian ovary and follicle development: some comparative and practical insights. *Turk. J. Vet Anim Sci.* **38**, 660–669, <https://doi.org/10.3906/vet-1405-6>
- Monniaux, D., Michel, P., Postel, M. and Clément, F. (2016) Multi-scale modelling of ovarian follicular development: From follicular morphogenesis to selection for ovulation. *Biol. Cell.* **108**, 149–160, <https://doi.org/10.1111/boc.201500087>
- Gougeon, A. (1996) Regulation of ovarian follicular development in primates: facts and hypotheses. *Endocr. Rev.* **17**, 121–155, <https://doi.org/10.1210/edrv-17-2-121>
- Donadeu, F.X., Fahiminiya, S., Esteves, C.L., Nadaf, J., Miedzinska, K., McNeilly, A.S. et al. (2014) Transcriptome profiling of granulosa and theca cells during dominant follicle development in the horse. *Biol. Reprod.* **91**, 1–12, <https://doi.org/10.1095/biolreprod.114.118943>
- Makoto, O., Kimihisa, T., Tsang, B.K. and Fumikazu, K. (2009) Oocyte-granulosa-theca cell interactions during preantral follicular development. *J. Ovarian Res.* **2**, 9–9
- Richards, J.S. (2001) Perspective: the ovarian follicle—a perspective in 2001. *Endocrinology* **142**, 2184, <https://doi.org/10.1210/endo.142.6.8223>
- Young, J.M. and McNeilly, A.S. (2010) Theca: the forgotten cell of the ovarian follicle. *Reproduction* **140**, 489–504, <https://doi.org/10.1530/REP-10-0094>
- Bosc, M.J. and Nicolle, A. (1997) Steroid productions by co-cultures of granulosa cells with inner and outer theca cells in preovulatory follicles of gonadotropin stimulated calves. *J. Steroid Biochem. Mol. Biol.* **62**, [https://doi.org/10.1016/S0960-0760\(97\)00030-7](https://doi.org/10.1016/S0960-0760(97)00030-7)
- Fortune, J.E. (1986) Bovine theca and granulosa cells interact to promote androgen production. *Biol. Reprod.* **35**, 292, <https://doi.org/10.1095/biolreprod35.2.292>
- Qiu, M., Quan, F., Han, C., Wu, B., Liu, J., Yang, Z. et al. (2013) Effects of granulosa cells on steroidogenesis, proliferation and apoptosis of stromal cells and theca cells derived from the goat ovary. *J. Steroid Biochem. Mol. Biol.* **138**, 325–333, <https://doi.org/10.1016/j.jsbmb.2013.06.005>
- Parrott, J.A. and Skinner, M.K. (1998) Developmental and hormonal regulation of hepatocyte growth factor expression and action in the bovine ovarian follicle. *Biol. Reprod.* **59**, 553–560, <https://doi.org/10.1095/biolreprod59.3.553>
- Parrott, J.A. and Skinner, M.K. (1998) Developmental and hormonal regulation of keratinocyte growth factor expression and action in the ovarian follicle. *Endocrinology* **139**, 228, <https://doi.org/10.1210/endo.139.1.5680>

- 13 Yifang, W., Eric, A. and Tsang, B.K. (2002) Involvement of transforming growth factor alpha in the regulation of rat ovarian X-linked inhibitor of apoptosis protein expression and follicular growth by follicle-stimulating hormone. *Biol. Reprod.* **66**, 1672–1680
- 14 Fumio, O. and Shunichi, S.A. (2002) negative feedback system between oocyte bone morphogenetic protein 15 and granulosa cell kit ligand: its role in regulating granulosa cell mitosis. *Proc. Natl. Acad. Sci. U.S.A.* **99**, 8060–8065
- 15 Salas, C., Julio-Pieper, M., Valladares, M., Pommer, R., Vega, M., Mastronardi, C. et al. (2006) Nerve growth factor-dependent activation of trkA receptors in the human ovary results in synthesis of follicle-stimulating hormone receptors and estrogen secretion. *J. Clin. Endocrinol. Metab.* **91**, 2396–2403, <https://doi.org/10.1210/jc.2005-1925>
- 16 Skinner, M.K., Schmidt, M., Savenkova, M.I., Sadler-Riggleman, I. and Nilsson, E.E. (2010) Regulation of granulosa and theca cell transcriptomes during ovarian antral follicle development. *Mol. Reprod. Dev.* **75**, 1457–1472, <https://doi.org/10.1002/mrd.20883>
- 17 Kaczmarek, M.M., Schams, D. and Ziecik, A.J. (2005) Role of vascular endothelial growth factor in ovarian physiology - an overview. *Reprod. Biol.* **5**, 111
- 18 Porter, T.E., Hargis, B.M., Silsby, J.L. and El, H.M.E. (1989) Differential steroid production between theca interna and theca externa cells: a three-cell model for follicular steroidogenesis in avian species. *Endocrinology* **125**, 109, <https://doi.org/10.1210/endo-125-1-109>
- 19 Nitta, H., Mason, J.I. and Bahr, J.M. (1993) Localization of 3 beta-hydroxysteroid dehydrogenase in the chicken ovarian follicle shifts from the theca layer to granulosa layer with follicular maturation. *Biol. Reprod.* **48**, 110–116, <https://doi.org/10.1095/biolreprod48.1.110>
- 20 Robinson, F.E. and Etches, R.J. (1986) Ovarian steroidogenesis during follicular maturation in the domestic fowl (*Gallus domesticus*). *Biol. Reprod.* **35**, 1096–1105, <https://doi.org/10.1095/biolreprod35.5.1096>
- 21 Bahr, J.M., Wang, S.C., Huang, M.Y. and Calvo, F.O. (1983) Steroid concentrations in isolated theca and granulosa layers of preovulatory follicles during the ovulatory cycle of the domestic hen. *Biol. Reprod.* **29**, 326, <https://doi.org/10.1095/biolreprod29.2.326>
- 22 Gómez, Y., Velázquez, P.N., Juárez-Oropeza, M.A. and Pedernera, E. (1998) Steroid metabolism in granulosa and theca interna cells from preovulatory follicles of domestic hen (*Gallus domesticus*). *Anim. Reprod. Sci.* **52**, 81–91, [https://doi.org/10.1016/S0378-4320\(98\)00087-6](https://doi.org/10.1016/S0378-4320(98)00087-6)
- 23 Deng, Y., Gan, X., Chen, D., Huang, H.L., Yuan, J.S., Qiu, J.M. et al. (2018) Comparison of growth characteristics of in vitro cultured granulosa cells from geese follicles at different developmental stages. *Biosci. Rep.* **38**, BSR20171361, <https://doi.org/10.1042/BSR20171361>
- 24 Tajima, K., Orisaka, M., Yata, H., Goto, K., Hosokawa, K. and Kotsuji, F. (2010) Role of granulosa and theca cell interactions in ovarian follicular maturation. *Microsc. Res. Tech.* **69**, 450–458, <https://doi.org/10.1002/jemt.20304>
- 25 Hatzirodos, N., Glistler, C., Hummitzsch, K., Irving-Rodgers, H.F., Knight, P.G. and Rodgers, R.J. (2017) Transcriptomal profiling of bovine ovarian granulosa and theca interna cells in primary culture in comparison with their in vivo counterparts. *PLoS ONE* **12**, e0173391, <https://doi.org/10.1371/journal.pone.0173391>
- 26 Gan, X., Chen, D., Deng, Y., Yuan, J., Kang, B., Qiu, J. et al. (2017) Establishment of an in vitro culture model of theca cells from hierarchical follicles in ducks. *Biosci. Rep.* **37**, BSR20160491, <https://doi.org/10.1042/BSR20160491>
- 27 Wen, R., Gan, X., Hu, S., Gao, S., Deng, Y., Qiu, J. et al. (2018) Evidence for the existence of de novo lipogenesis in goose granulosa cells. *Poult. Sci.* **98**, 1023–1030, <https://doi.org/10.3382/ps/pey400>
- 28 Livak, K.J. and Schmittgen, T.D. (2001) Analysis of relative gene expression data using real-time quantitative PCR and the 2(-Delta Delta C(T)) Method. *Methods* **25**, 402–408, <https://doi.org/10.1006/meth.2001.1262>
- 29 Pawlikowska, P., Leray, I.L.B., Guihard, S., Kumar, R., Rosselli, F. and Porteu, F. (2010) ATM-dependent expression of IEX-1 controls nuclear accumulation of Mcl-1 and the DNA damage response. *Cell Death Differ.* **17**, 1739–1750, <https://doi.org/10.1038/cdd.2010.56>
- 30 Virginie, B., Ron, S., Mary, A.G., Paul, M.G., Lawrence, D.A., Brian, H. et al. (2015) Elevated cytokines, thrombin and PAI-1 in severe HCPS patients due to Sin Nombre virus. *Viruses* **7**, 559–589
- 31 Rahima, Z., Moeller, B.J., Whalen, E.J., Milena, B., Ke, X., Siqing, S. et al. (2007) Epinephrine-induced activation of LW-mediated sickle cell adhesion and vaso-occlusion in vivo. *Blood* **110**, 2708–2717
- 32 Bachhav, S.S., Bhutada, M.S., Patil, S.P., Sharma, K.S. and Patil, S.D. (2015) Oleanolic Acid Prevents Increase in Blood Pressure and Nephrotoxicity in Nitric Oxide Dependent Type of Hypertension in Rats. *Pharmacognosy Res.* **7**, 385–392
- 33 Johnson, P.A. (2012) Follicle selection in the avian ovary. *Reprod. Domest. Anim.* **47**, 283–287, <https://doi.org/10.1111/j.1439-0531.2012.02087.x>
- 34 Onagbesan, O. and Bruggeman, V.E. (2009) Intra-ovarian growth factors regulating ovarian function in avian species: a review. *Anim. Reprod. Sci.* **111**, 121–140, <https://doi.org/10.1016/j.anireprosci.2008.09.017>
- 35 Kimihisa, T., Makoto, O., Kumiko, H., Abraham, A. and Fumikazu, K. (2002) Effects of ovarian theca cells on apoptosis and proliferation of granulosa cells: changes during bovine follicular maturation. *Biol. Reprod.* **66**, 1635
- 36 Elis, S., Desmarchais, A., Maillard, V., Uzbekova, S., Monget, P. and Dupont, J. (2015) Cell proliferation and progesterone synthesis depend on lipid metabolism in bovine granulosa cells. *Theriogenology* **83**, 840–853, <https://doi.org/10.1016/j.theriogenology.2014.11.019>
- 37 Slonina, D. and Banasinska, K. (2010) In-vitro maturation of equine oocytes in co-culture with granulosa and theca interna cells. *Equine Vet. J.* **25**, 84–86
- 38 Li, Z. and Johnson, A.L. (1993) Regulation of P450 cholesterol side-chain cleavage messenger ribonucleic acid expression and progesterone production in hen granulosa cells. *Biol. Reprod.* **49**, 463
- 39 Shenqiang, H., Chao, G., Rui, W., Qihai, X., Hua, G., Hehe, L. et al. (2014) Role of leptin in the regulation of sterol/steroid biosynthesis in goose granulosa cells. *Theriogenology* **82**, 677–685
- 40 Lee, K.A., Volentine, K.K. and Bahr, J.M. (1998) Two Steroidogenic Pathways Present in the Chicken Ovary: Theca Layer Prefers  $\Delta^5$  Pathway and Granulosa Layer Prefers  $\Delta^4$  Pathway ☆. *Domest. Anim. Endocrinol.* **15**, 1–8, [https://doi.org/10.1016/S0739-7240\(97\)00057-X](https://doi.org/10.1016/S0739-7240(97)00057-X)
- 41 Johnson, A.L. and Woods, D.C. (2009) Dynamics of avian ovarian follicle development: Cellular mechanisms of granulosa cell differentiation ☆. *Gen. Comp. Endocrinol.* **163**, 12–17, <https://doi.org/10.1016/j.ygcen.2008.11.012>

- 42 Nitta, H., Osawa, Y. and Bahr, J.M. (1991) Immunolocalization of steroidogenic cells in small follicles of the chicken ovary: anatomical arrangement and location of steroidogenic cells change during follicular development. *Domest. Anim. Endocrinol.* **8**, 587–594, [https://doi.org/10.1016/0739-7240\(91\)90028-I](https://doi.org/10.1016/0739-7240(91)90028-I)
- 43 Huang, E.S.R., Kao, K. and Nalbandov, A. (1979) Synthesis of sex steroids by cellular components of chicken follicles. *Biol. Reprod.* **20**, 454–461, <https://doi.org/10.1095/biolreprod20.3.454>
- 44 Allegrucci, C., Hunter, M.G., Webb, R. and Luck, M.R. (2003) Interaction of bovine granulosa and theca cells in a novel serum-free co-culture system. *Reproduction* **126**, 527, <https://doi.org/10.1530/rep.0.1260527>
- 45 Orisaka, M., Mizutani, T., Tajima, K., Orisaka, S., Shukunami, K., Miyamoto, K. et al. (2010) Effects of ovarian theca cells on granulosa cell differentiation during gonadotropin-independent follicular growth in cattle. *Mol. Reprod. Dev.* **73**, 737–744, <https://doi.org/10.1002/mrd.20246>
- 46 Qiu, M., Liu, J., Han, C., Wu, B., Yang, Z., Su, F. et al. (2014) The influence of ovarian stromal/theca cells during in vitro culture on steroidogenesis, proliferation and apoptosis of granulosa cells derived from the goat ovary. *Reprod. Domest. Anim.* **49**, 170–176, <https://doi.org/10.1111/rda.12256>
- 47 Johnson, A.L. (2015) Ovarian follicle selection and granulosa cell differentiation. *Poult. Sci.* **94**, 781, <https://doi.org/10.3382/ps/peu008>
- 48 Manabe, N., Goto, Y., Matsuda-Minehata, F., Inoue, N., Maeda, A., Sakamaki, K. et al. (2004) Regulation mechanism of selective atresia in porcine follicles: regulation of granulosa cell apoptosis during atresia. *J. Reprod. Dev.* **50**, 493–514, <https://doi.org/10.1262/jrd.50.493>
- 49 Imamichi, Y., Sekiguchi, T., Kitano, T., Kajitani, T., Okada, R., Inaoka, Y. et al. (2017) Diethylstilbestrol administration inhibits theca cell androgen and granulosa cell estrogen production in immature rat ovary. *Sci. Rep.* **7**, 8374, <https://doi.org/10.1038/s41598-017-08780-7>
- 50 Zhilin, L., Rudd, M.D., Inmaculata, H.G., Ignacio, G.R., Heng-Yu, F., Zeleznik, A.J. et al. (2009) FSH and FOXO1 regulate genes in the sterol/steroid and lipid biosynthetic pathways in granulosa cells. *Mol. Endocrinol.* **23**, 649–661
- 51 Mu, Y.M., Yanase, T., Nishi, Y., Tanaka, A., Saito, M., Jin, C.H. et al. (2001) Saturated FFAs, palmitic acid and stearic acid, induce apoptosis in human granulosa cells. *Endocrinology* **142**, 3590–3597, <https://doi.org/10.1210/endo.142.8.8293>
